# Supplementary material for: Rac1 Signaling Is Required for Insulin-Stimulated Glucose Uptake and Is Dysregulated in Insulin-Resistant Murine and Human Skeletal Muscle
Source: PubMed Central journal article supplement — Diabetes. 2013 May 17;62(6):1865–75. doi: 10.2337/db12-1148 (PMC3661612; doi:10.2337/db12-1148), 2013-05-17

## SUPPLEMENTARY DATA

**Supplementary Figure 1.** Bar graph showing Rac1-GTP binding in L6 myotubes in lysate (50  $\mu$ g protein loaded) incubated with either GDP (1 mM) or GTP- $\gamma$ S (0.1 mM) for 20 min at 30°C on a shaker (400 rpm), and in response to insulin (100 nM, 20 min, n=6), measured by the commercially available Rac1 GLISA kit. Values are mean  $\pm$  S.E.M.

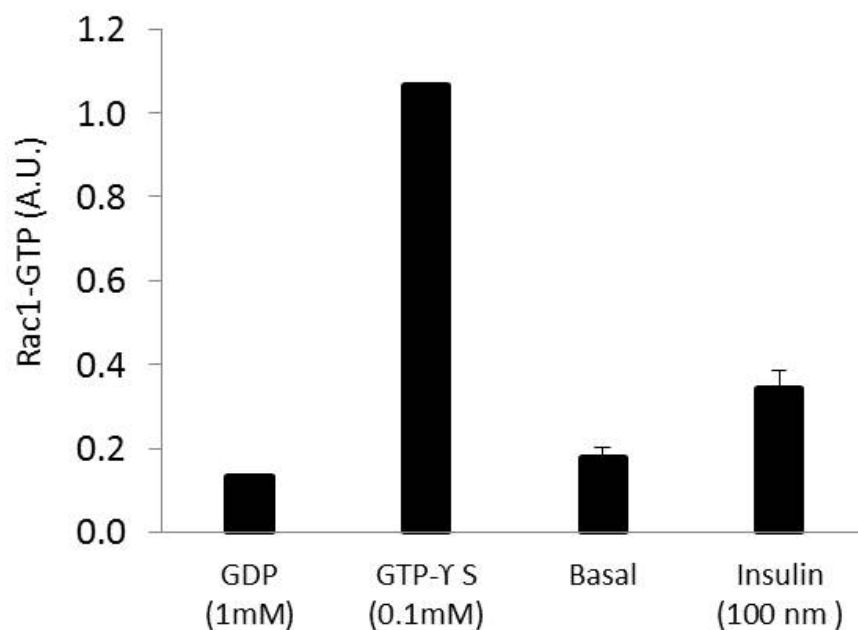

Supplement: supp_db12-1148_DB121148SupplementaryData.pdf [file supp_db12-1148_DB121148SupplementaryData.pdf]
